# Supplementary material
Source: PubMed Central journal article supplement (PMC5370079)

eFigure. Locations of eighteen studies examining the within-participant correlation between ambient and personal  $PM_{2.5}$ .

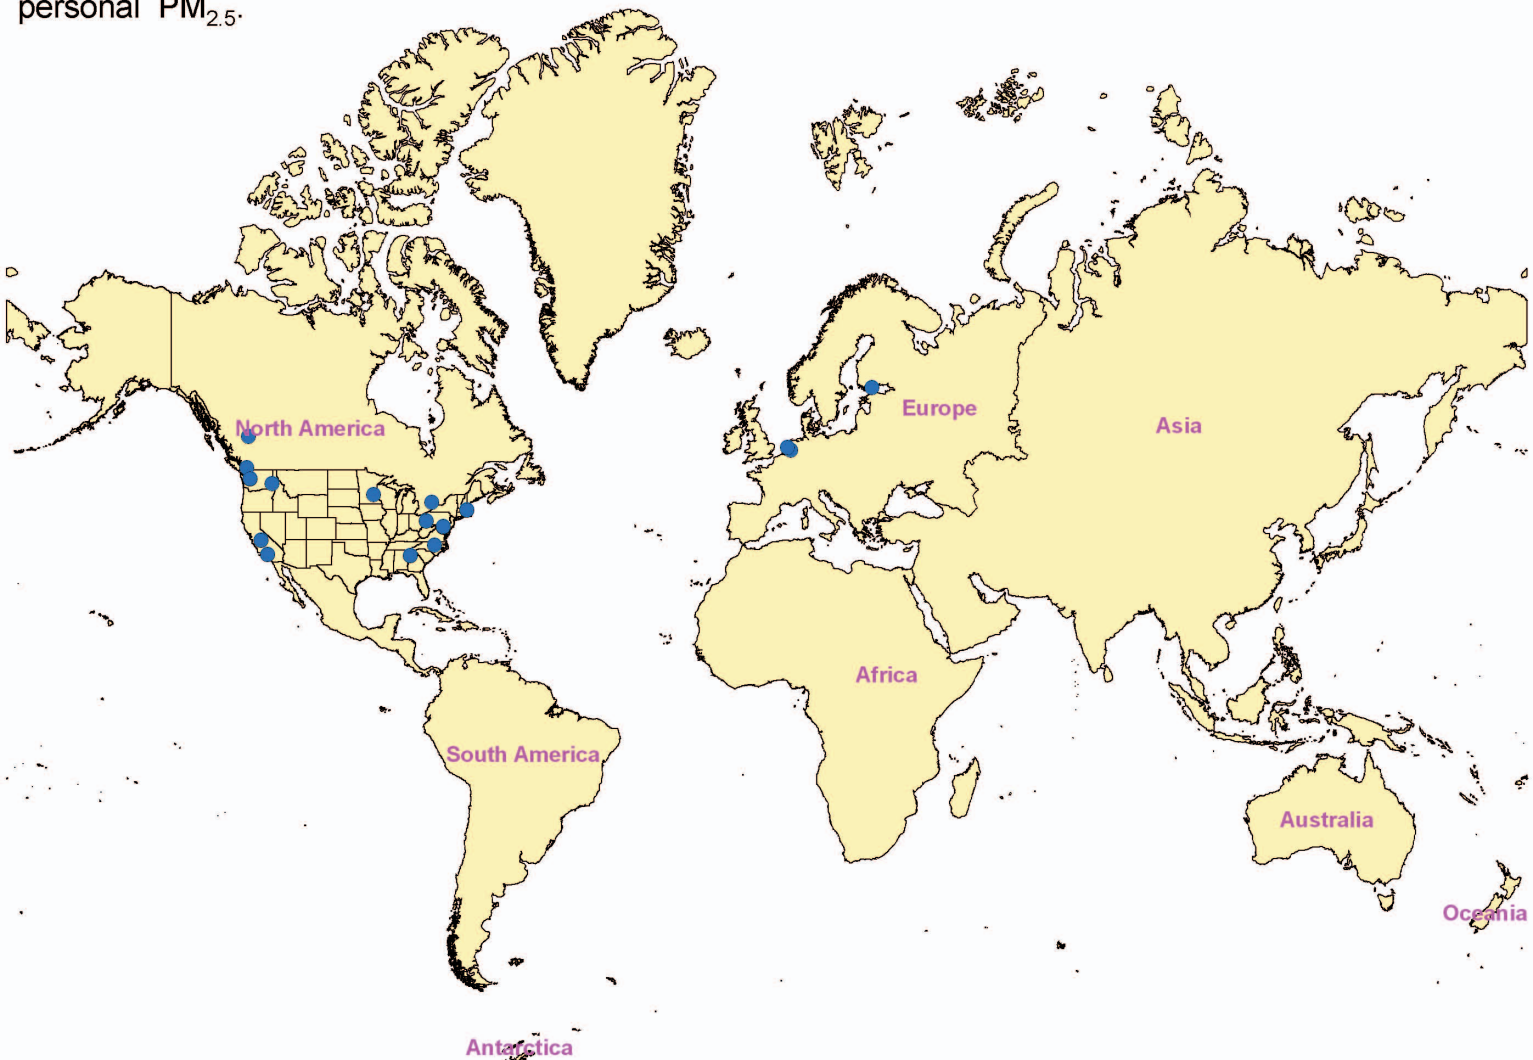

Supplement: NIHMS851580-supplement-Supplemental_eFigure.pdf [file NIHMS851580-supplement-Supplemental_eFigure.pdf]
